# Supplementary material
Source: PubMed Central journal article supplement (PMC9579901)
Supplement: jama-e2218231-s002.pdf [file jama-e2218231-s002.pdf]

1  
2  
3  
4  
5  
6  
7  
8  
9

This supplement contains the following items

1. Original protocol
2. Summary of changes to the protocol
3. Original statistical analysis plan

|    |                                    |    |
|----|------------------------------------|----|
| 10 | TABLE OF CONTENTS                  |    |
| 11 | ORIGINAL PROTOCOL                  | 3  |
| 12 | SUMMARY OF CHANGES TO THE PROTOCOL | 9  |
| 13 | ORIGINAL STATISTICAL ANALYSIS PLAN | 10 |
| 14 |                                    |    |
| 15 |                                    |    |

16  
17

Original protocol  
(from February 13<sup>th</sup> 2018)

18 **Spinal cord burst stimulation in patients with failed back surgery syndrome: A**  
19 **randomized double-blind sham-controlled crossover trial**

20

21 Sasha Gulati MD PhD (1,2), Sozaburo Hara MD (1), Sven M. Carlsen MD PhD (3,4), Ole Solheim MD PhD  
22 (1,2), Jan V. Jørgensen MD (1), Kristin Taraldsen PhD (2), Tomm B. Müller MD PhD (1), Øystein P.  
23 Nygaard MD PhD (1,2), Mattis A. Madsbu MS (1,2), Astrid Brautaset MD (5), Erling A. Tronvik MD PhD  
24 (2,6), Eirik Amundal MD (5,6), Agnete M. Gulati MD (2,8), Asgeir S. Jakola MD PhD (9), Tore K. Solberg  
25 MD PhD (10), Petter Borchgrevink MD PhD (5), and Øyvind Salvesen MSc PhD (11)

26

27 1. Department of Neurosurgery, St. Olavs University Hospital 2. Department of Neuromedicine and Movement Science, NTNU 3. Department  
28 of Endocrinology, St. Olavs University Hospital 4. Department of Clinical and Molecular Medicine, NTNU 5. Norwegian Advisory Unit on  
29 Complex Symptom Disorders, St. Olavs University Hospital 6. Department of Neurology, St. Olavs University Hospital 7. Department of  
30 Anesthesia, St. Olavs University Hospital 8. Department of Rheumatology, St. Olavs University Hospital 9. Department of Neurosurgery,  
31 Sahlgrenska University Hospital, Gothenburg, Sweden 10. Departement of Neurosurgery and Norwegian Spine Registry, University of Hospital  
32 of North Norway 11. Department of Public Health and Nursing, NTNU

33

34 **1. Relevance relative to the call for proposals**

35 Funding is sought for one ph.d. student for a period of 3 years within the framework of the project. The  
36 study is in compliance with the strategic documents of *the Central Norway Regional Health Authority, St.*  
37 *Olavs Hospital* and *the Department of Neuromedicine and Movement Science (INB)*, NTNU. This trial  
38 focuses on patient-related clinical research, medical technology, patient safety and cost-effectiveness.  
39 Management of chronic back pain seems to interest not only medical researchers and decision makers but  
40 also the general public and receives constant media attention. The trial is highly relevant to society and may  
41 benefit large groups of patients on both a national and international level. Funding of a ph.d. student is  
42 important to maintain our status as a leading international research group on degenerative spinal disorders.

43

44 **2. Background and status of knowledge**

45 The Global Burden of Disease study tracks the prevalence of deaths and diseases worldwide and uses a  
46 metric called “Disability Adjusted Life Years” (DALYs).<sup>1</sup> DALYs combine the number of years of life a  
47 person loses if they die prematurely with the amount of time they spend living with a disability. Think of it  
48 as time patients did not spend living their *#bestlife* – because of illness or death. In developed countries, the  
49 number one cause of these DALYs is not surprising: ischemic heart disease. However, the number two  
50 condition is perhaps a bit surprising: plain, old-fashioned, ever-present, back pain. In fact, low back pain is  
51 the leading cause of activity limitation and work absence throughout much of the world, and it is an  
52 enormous economic burden on the whole society ranging from individuals, families, communities, industry  
53 and all the way to governments.<sup>2</sup> Back pain affects people of all ages<sup>3,4</sup> and although the natural course  
54 often is favorable, more than 5,000 patients undergo spine surgery annually in Norway alone. The most  
55 common reasons for low back surgery are persisting or intolerable pain due to sciatica and narrowing of the  
56 spinal canal (i.e. spinal stenosis).<sup>5,6</sup> Unfortunately, 10-40% of patients who undergo spine surgery  
57 experience persisting or worsening of pain and disability.<sup>7</sup> Spinal cord stimulation (SCS) is a commonly  
58 established therapy to treat chronic neuropathic pain of various etiologies (Figure 1). One of the most  
59 common indications for SCS is failed back surgery syndrome (FBSS), a persistent or recurrent complex  
60 chronic pain syndrome with mixed neuropathic/radicular and nociceptive (e.g., mechanical, inflammatory)  
61 elements following spine surgery.<sup>8</sup> In traditional SCS therapies, the objective has been to replace the pain  
62 sensation with paresthesia that requires mapping of stimulation to the region of pain. The anticipation is that  
63 the electrical current alters pain processing by masking the sensation of pain with a comfortable tingling or  
64 paresthesia. Although patients mostly cope with paresthesia, a significant proportion reports that the  
65 sensation is unpleasant, particularly with positional changes. The stimulation is provided either through  
66 electrodes that are placed through a small skin incision into the epidural space or through a surgical paddle  
67 lead that is delivered via a laminotomy or laminectomy. Patients typically undergo a testing period of  
68 neuromodulation with an externalized power source and if this test proves to be positive and compelling,  
69 they subsequently have a subcutaneously implantable pulse generator (“pacemaker”) for long-term therapy.

70

71 The field of neuromodulation for the treatment of pain has developed rapidly since the seminal paper on the  
72 electrical inhibition of pain by stimulation of the dorsal column more than 50 years ago.<sup>9</sup> As is often the case  
73 in surgery, the widespread use of SCS has not been backed by solid evidence. The existing SCS literature is  
74 dominated a large number of case series reports and only a limited number of high quality, industry-  
75 independent, large prospective, consecutively recruited, randomized, or controlled comparative trials.<sup>10-16</sup>  
76 The absence of placebo-controlled trials has long been an important point of criticism of the stimulation  
77 literature. Due to the to the nature of the interventions with the sensation of paresthesia, studies with placebo  
78 control have not been considered possible. However, recent advances in SCS allow paresthesia-free  
79 stimulation.<sup>17</sup> Burst stimulation, utilizes complex programming to deliver high-frequency stimuli of a 40 Hz  
80 burst mode with 5 spikes at 500 Hz per spike delivered in a constant current mode. Using this methodology,  
81 it has been suggested that burst SCS may provide paresthesia-free stimulation resulting in better pain relief  
82 of low back and leg pain when compared to traditional tonic stimulation.<sup>18</sup> Moreover, this programming  
83 mode also allows comparison with placebo stimulation since the stimulation is often undetected by the  
84 patient. In the literature, SCS is reported as a safe procedure due to its reversible and minimally invasive  
85 characteristics.<sup>19</sup> Although catastrophic complications are possible (i.e. neurological injury, epidural  
86 hematoma), they are extremely rare. However, the incidence of minor complications of SCS (i.e. lead  
87 fracture, lead migration, infection, discomfort at implant site, implantable pulse generator seroma, dural  
88 puncture) is reported at around 30%-40%. These minor complications tend to occur within 12 months of  
89 implantation and are readily reversible and generally resolved. Although SCS is an established treatment,  
90 questions concerning treatment effects and cost-effectiveness remain unanswered, especially for burst SCS.

91  
92 The aim of this randomized double-blind sham-controlled crossover trial is to evaluate the efficacy of burst  
93 SCS in patients with FBSS.

94

### 95 **3. Topics and objectives**

#### 96 **3.1 Primary outcome measure**

97 The primary outcome is difference in change from baseline on the Oswestry disability index (ODI), version  
98 2.0, between active burst stimulation and placebo stimulation periods.<sup>20,21</sup> The ODI questionnaire quantifies  
99 disability for degenerative conditions of the lumbar spine and covers intensity of pain, ability to lift, ability  
100 to care for oneself, ability to walk, ability to sit, sexual function, ability to stand, social life, sleep quality,  
101 and ability to travel. For each topic there are six statements describing potential scenarios, and patients  
102 select the one that most closely resembles their situation. The index is scored from 0 to 100. Zero means no  
103 disability and 100 reflects maximum disability.

#### 104 **3.2 Secondary outcome measures**

- 105 • Changes in generic health-related quality of life measured with the Euro-Qol-5D
- 106 • Back pain and leg pain measured using numerical rating scales (NRS)
- 107 • Brief Pain Inventory (Short form)
- 108 • Level of physical activity
- 109 • Cost-effectiveness
- 110 • Use of analgesics

111

112

113 **Figure 1. The concept of burst spinal cord stimulation**

114

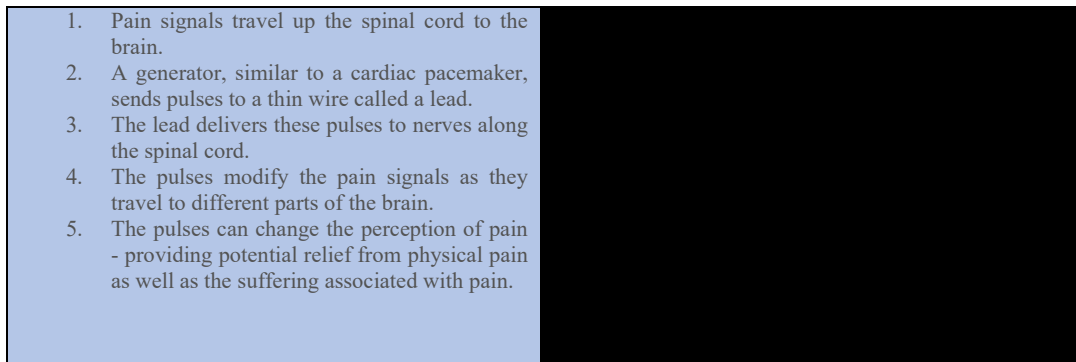

115

116 **4. Methods and materials**

117 **4.1 Study population, ethics, trial registration and user involvement**

118 The study will be conducted at St. Olavs University Hospital. SCS procedures have been performed at the  
119 Department of Neurosurgery for thirty years, and 30-40 patients undergo the procedure annually. The  
120 Norwegian Back Pain Association (*Ryggforeningen*) will be provided the opportunity to review the study  
121 protocol and give feedback concerning study design and outcome measures. An application for ethical  
122 approval will be submitted to The Regional Committee for Medical Research in Central-Norway. The study  
123 will be registered in Clinicaltrials.gov.

124

125 **4.1 Inclusion criteria**

- 126 1. Patients  $\geq 18$  years who have undergone  $\geq 1$  back surgeries and later developed FBSS, defined as  
127 chronic, intractable pain of the trunk and/or limbs that has remained refractory to non-surgical  
128 treatment for  $\geq 6$  months.
- 129 2. Minimum pain intensity of 5/10 on the NRS at baseline.
- 130 3. Successful two-week SCS testing period with tonic stimulation ( $\geq 30\%$  reduction in NRS from  
131 baseline). This means patients will experience paresthesia during the SCS trial period.
- 132 4. Mandatory assessment at the Norwegian Advisory Unit on Complex Symptom Disorders, St. Olavs  
133 University Hospital.

134

135 **4.2 Exclusion criteria**

- 136 1. Coexisting conditions that would increase procedural risk (e.g., sepsis, coagulopathy).
- 137 2. History of laminectomy or posterior fusion at the thoracolumbar junction, where percutaneous  
138 electrode end tips are routinely placed.
- 139 3. Abnormal pain behavior and/or unresolved psychiatric illness.
- 140 4. Unresolved issues of secondary gain or inappropriate medication use.

141

142 **4.3 Follow-up during the study**

143 During the 12 months following implantation the patients will undergo four three-month long periods with  
144 either burst SCS or no stimulation (sham) in a randomized order. All patients will undergo two periods of  
145 SCS and sham stimulation. The outcome measures will be collected prior to the test period and at the end of  
146 each of the four treatment periods.

147

148 **4.4 “Pentablinding” of the study**

149 The patients will be blinded to the actual treatment allocation during the different study periods (first  
150 blinding). The surgeons and all study personnel involved in handling the patients and collecting the study  
151 data (except those who perform the actual setting of the device) will be blinded to the actual treatment  
152 allocation (second blinding). All study personnel evaluation end points measures will be blinded to the  
153 actual treatment (third blinding). All the tables and figures to be presented from the study will be settled  
154 before any data from the study is evaluated in order to avoid selective presentation of findings according to

155 statistical results (fourth blinding). The statistician performing the statistical procedures on the outcome of  
156 the study will be blinded. The data will only show treatment allocation as treatment A and treatment B. Then  
157 the tables and figures are filled in (fifth blinding). In order to minimize the possibility of incidental  
158 unblinding the main outcome measure will be evaluated first, the secondary endpoints and lastly adverse  
159 effects. All statistical analyses will be predefined before commencement of the study. Only after all this has  
160 been performed and the procedures documented at the Unit for Applied Clinical Research (NTNU), the  
161 codes will be broken. The only remaining procedure will then be to substitute treatment A and B in the  
162 tables and figures with active and placebo. This ambitious procedure will secure maximum possible blinding  
163 of the study, integrity of the study and make the study results trustworthy.

164

#### 165 **4.5 Sample size calculation**

166 For the sample size calculation, the outcome variable is defined as the difference between each participant's  
167 mean ODI scores under "treatment A" and "treatment B". Assuming that the population mean and the  
168 standard deviation for the differences are 10 and 18, respectively, a one sample t-test of the differences at  
169 the 5% significance level needs 34 study participants to achieve 90% power.

170

#### 171 **5. Description of the research group**

172 This study unites several groups at INB (NTNU) and St. Olavs Hospital, as well as both national and  
173 international collaborators. Most of the researchers involved have extensive research experience,  
174 longstanding collaborations, and have published in top tier journals together. The project leader, professor  
175 Gulati, has already supervised several master and ph.d. students. There is a need for a ph.d. student and this  
176 student will join an established and productive research group with a friendly and constructive working  
177 environment.

178

#### 179 **6. Activity plan, publishing and plan for implementation**

180 The study will commence when funding and ethical approval has been obtained, hopefully in September  
181 2018. Data collection should be completed by March 2021, and data analyses, interpretation of results and  
182 writing of the manuscript will be completed by March 2022. This study will give rise to at least one  
183 scholarly publication that will be published in a high-ranking international peer-reviewed journal. Results  
184 will also be presented at both national and international scientific meetings and conferences. Further, we will  
185 focus on popular science dissemination through local and national media channels and social media  
186 channels.

187

188

189

190

191 **7. Budget**

192 Funding is sought for one ph.d. student. Payroll expenses for other members of the group are covered by  
193 their current employers. The Department of Neurosurgery will cover all expenses for inpatient treatment and  
194 SCS implant costs. Funding will later be sought for one research nurse.

195

196 **8. References**

197 1. Global, regional, and national disability-adjusted life-years (DALYs) for 333 diseases and injuries and healthy life expectancy (HALE)  
198 for 195 countries and territories, 1990-2016: a systematic analysis for the Global Burden of Disease Study 2016. *Lancet (London,*  
199 *England)*. 2017;390(10100):1260-1344.

200 2. Hoy D, March L, Brooks P, et al. The global burden of low back pain: estimates from the Global Burden of Disease 2010 study.  
201 *Annals of the rheumatic diseases*. 2014;73(6):968-974.

202 3. Giannadakis C, Solheim O, Jakola AS, et al. Surgery for Lumbar Spinal Stenosis in Individuals Aged 80 and Older: A Multicenter  
203 Observational Study. *J Am Geriatr Soc*. 2016;64(10):2011-2018.

204 4. Gulati S, Madsbu MA, Solberg TK, et al. Lumbar microdiscectomy for sciatica in adolescents: a multicentre observational registry-  
205 based study. *Acta neurochirurgica*. 2017;159(3):509-516.

206 5. Madsbu MA, Solberg TK, Salvesen O, Nygaard OP, Gulati S. Surgery for Herniated Lumbar Disk in Individuals 65 Years of Age or  
207 Older: A Multicenter Observational Study. *JAMA Surg*. 2017.

208 6. Nerland US, Jakola AS, Solheim O, et al. Minimally invasive decompression versus open laminectomy for central stenosis of the  
209 lumbar spine: pragmatic comparative effectiveness study. *BMJ (Clinical research ed)*. 2015;350:h1603.

210 7. Nerland US, Jakola AS, Giannadakis C, et al. The risk of getting worse: Predictors of deterioration after decompressive surgery for  
211 lumbar spinal stenosis - A multicenter observational study. *World neurosurgery*. 2015.

212 8. Grider JS, Manchikanti L, Carayannopoulos A, et al. Effectiveness of Spinal Cord Stimulation in Chronic Spinal Pain: A Systematic  
213 Review. *Pain physician*. 2016;19(1):E33-54.

214 9. Shealy CN, Mortimer JT, Reswick JB. Electrical inhibition of pain by stimulation of the dorsal columns: preliminary clinical report.  
215 *Anesthesia and analgesia*. 1967;46(4):489-491.

216 10. Kapural L, Yu C, Doust MW, et al. Novel 10-kHz High-frequency Therapy (HF10 Therapy) Is Superior to Traditional Low-frequency  
217 Spinal Cord Stimulation for the Treatment of Chronic Back and Leg Pain: The SENZA-RCT Randomized Controlled Trial.  
218 *Anesthesiology*. 2015;123(4):851-860.

219 11. Kapural L, Yu C, Doust MW, et al. Comparison of 10-kHz High-Frequency and Traditional Low-Frequency Spinal Cord Stimulation  
220 for the Treatment of Chronic Back and Leg Pain: 24-Month Results From a Multicenter, Randomized, Controlled Pivotal Trial.  
221 *Neurosurgery*. 2016;79(5):667-677.

222 12. Kumar K, Taylor RS, Jacques L, et al. Spinal cord stimulation versus conventional medical management for neuropathic pain: a  
223 multicentre randomised controlled trial in patients with failed back surgery syndrome. *Pain*. 2007;132(1-2):179-188.

224 13. North RB, Kidd DH, Farrokhi F, Piantadosi SA. Spinal cord stimulation versus repeated lumbosacral spine surgery for chronic pain: a  
225 randomized, controlled trial. *Neurosurgery*. 2005;56(1):98-106; discussion 106-107.

226 14. Perruchoud C, Eldabe S, Batterham AM, et al. Analgesic efficacy of high-frequency spinal cord stimulation: a randomized double-  
227 blind placebo-controlled study. *Neuromodulation : journal of the International Neuromodulation Society*. 2013;16(4):363-369;  
228 discussion 369.

229 15. Schu S, Sloty PJ, Bara G, von Knop M, Edgar D, Vesper J. A prospective, randomised, double-blind, placebo-controlled study to  
230 examine the effectiveness of burst spinal cord stimulation patterns for the treatment of failed back surgery syndrome.  
231 *Neuromodulation : journal of the International Neuromodulation Society*. 2014;17(5):443-450.

232 16. Schultz DM, Webster L, Kosek P, Dar U, Tan Y, Sun M. Sensor-driven position-adaptive spinal cord stimulation for chronic pain.  
233 *Pain physician*. 2012;15(1):1-12.

234 17. De Andres J, Monsalve-Dolz V, Fabregat-Cid G, et al. Prospective, Randomized Blind Effect-on-Outcome Study of Conventional vs  
235 High-Frequency Spinal Cord Stimulation in Patients with Pain and Disability Due to Failed Back Surgery Syndrome. *Pain medicine*  
236 *(Malden, Mass)*. 2017;18(12):2401-2421.

237 18. De Ridder D, Plazier M, Kamerling N, Menovsky T, Vanneste S. Burst spinal cord stimulation for limb and back pain. *World*  
238 *neurosurgery*. 2013;80(5):642-649.e641.

239 19. Verrills P, Sinclair C, Barnard A. A review of spinal cord stimulation systems for chronic pain. *Journal of pain research*. 2016;9:481-  
240 492.

241 20. Fairbank JC, Couper J, Davies JB, O'Brien JP. The Oswestry low back pain disability questionnaire. *Physiotherapy*. 1980;66(8):271-  
242 273.

243 21. Grotle M, Brox JI, Vollestad NK. Cross-cultural adaptation of the Norwegian versions of the Roland-Morris Disability Questionnaire  
244 and the Oswestry Disability Index. *J Rehabil Med*. 2003;35(5):241-247.

245

246



## Summary of changes to the protocol

247

248

249 1. In the original inclusion criteria (Section 4.1 in the protocol) we stated that all study participants had to  
250 undergo a mandatory assessment at the Norwegian Advisory Unit on Complex Symptom Disorders, St.  
251 Olavs University Hospital. Due to logistical issues this was changed to a mandatory assessment at the  
252 Multidisciplinary outpatient clinic for back, neck, and shoulder rehabilitation, St. Olavs University Hospital.  
253 This change was also made to the registration in Clinicaltrials.gov. Brief Pain Inventory and use of analgesics were  
254 specified as secondary outcomes in the protocol, but were omitted before trial registration and commencement. The  
255 reason for omitting the Brief Pain Inventory was that pain is extensively covered by the other self-reported outcomes.  
The reason for omitting use of analgesics was that we did not want to overburden study participants with data  
registration, several analgesics (ie., acetaminophen, ibuprofen) are available over-the-counter without a prescription,  
and inappropriate medication use was an exclusion criterion.

256

257

258

Original statistical analysis plan

259 1. Statistical Analysis Plan

260

261 The Statistical Analysis Plan of May 10<sup>th</sup> 2022 has not been changed and is final:

262

263 Administrative information:

|                           |                                                                                                                                                                 |
|---------------------------|-----------------------------------------------------------------------------------------------------------------------------------------------------------------|
| Sponsor name              | St. Olavs Hospital                                                                                                                                              |
| Sponsor address           | Nevroklinikken, 7006 Trondheim, Norway                                                                                                                          |
| REC no.                   | 2018/475                                                                                                                                                        |
| Trial title               | Spinal cord burst stimulation for chronic radicular neuropathic pain following lumbar spine surgery: A randomized double-blind sham- controlled crossover trial |
| Trial registration number | NCT03546738                                                                                                                                                     |

264

265

266 SAP and protocol version

|                      |                                                                                                                                 |
|----------------------|---------------------------------------------------------------------------------------------------------------------------------|
| SAP version and date | This SAP is version 1, dated May 10 <sup>th</sup> 2022                                                                          |
| Protocol version     | This document was written based on information contained in the study protocol version 1.0, dated January 18 <sup>th</sup> 2018 |

267

268 SAP revision history

| Protocol version | SAP version | Section number changed | Description and reason for change | Date changed              |
|------------------|-------------|------------------------|-----------------------------------|---------------------------|
| 1.0              | 1.0         | NA                     | First edition of SAP              | May 10 <sup>th</sup> 2022 |

269

270

271 2. Signature page  
272

Principal/coordinating investigator:

Consultant neurosurgeon Sozaburo Hara, MD  
Department of Neurosurgery  
St. Olavs Hospital  
7006 Trondheim, Norway



Signature

10.05.2022  
Date (dd/mm/yyyy)

Trial statistician:

Associate professor Øyvind O. Salvesen, MSc PhD  
Norwegian University of Science and Technology  
7006 Trondheim, Norway



Signature

10.05.2022  
Date (dd/mm/yyyy)

Main supervisor:

Consultant neurosurgeon and professor Sasha Gulati, MD PhD  
Department of Neurosurgery  
St. Olavs Hospital  
7006 Trondheim, Norway



Signature

10.05.2022  
Date (dd/mm/yyyy)

273  
274

275 3. Abbreviations

|       |                                   |
|-------|-----------------------------------|
| SCS   | Spinal cord stimulation           |
| ODI   | Oswestry disability index         |
| NRS   | Numerical rating scale            |
| EQ-5D | EuroQol 5D                        |
| PROMs | Patient reported outcome measures |
| FAS   | Full analysis set                 |
| PPS   | Per protocol set                  |
| CCS   | Complete case set                 |

276

|     |                                                                |           |
|-----|----------------------------------------------------------------|-----------|
| 277 | <b>Table of contents</b>                                       |           |
| 278 | <b>ORIGINAL PROTOCOL</b> .....                                 | <b>3</b>  |
| 279 | <b>SUMMARY OF CHANGES TO THE PROTOCOL</b> .....                | <b>9</b>  |
| 280 | <b>ORIGINAL STATISTICAL ANALYSIS PLAN</b> .....                | <b>10</b> |
| 281 | <b>1. STATISTICAL ANALYSIS PLAN</b> .....                      | <b>11</b> |
| 282 | <b>2. SIGNATURE PAGE</b> .....                                 | <b>12</b> |
| 283 | <b>3. ABBREVIATIONS</b> .....                                  | <b>13</b> |
| 284 | <b>4. INTRODUCTION</b> .....                                   | <b>16</b> |
| 285 | <b>4.1 Background and rationale</b> .....                      | <b>16</b> |
| 286 | <b>4.2 Trial objectives</b> .....                              | <b>16</b> |
| 287 | 4.2.1 Primary objective.....                                   | 16        |
| 288 | 4.2.2 Secondary objectives .....                               | 16        |
| 289 | <b>5. TRIAL METHODS</b> .....                                  | <b>16</b> |
| 290 | <b>5.1 Trial design</b> .....                                  | <b>16</b> |
| 291 | <b>5.2 Randomization</b> .....                                 | <b>17</b> |
| 292 | <b>5.3 Sample size</b> .....                                   | <b>17</b> |
| 293 | <b>5.4 Statistical framework</b> .....                         | <b>17</b> |
| 294 | 5.4.1 Hypothesis test.....                                     | 17        |
| 295 | 5.4.2 Statistical interim analyses and stopping guidance ..... | 17        |
| 296 | 5.4.3 Timing of final analysis.....                            | 17        |
| 297 | 5.4.4 Timing of outcome assessments .....                      | 17        |
| 298 | <b>5.5 Blinding procedure</b> .....                            | <b>18</b> |
| 299 | <b>6. STATISTICAL PRINCIPLES</b> .....                         | <b>18</b> |
| 300 | <b>6.1 Confidence intervals and p-values</b> .....             | <b>18</b> |
| 301 | <b>6.2 Adherence and protocol deviations</b> .....             | <b>19</b> |
| 302 | <b>6.3 Analysis populations</b> .....                          | <b>19</b> |
| 303 | <b>7. TRIAL POPULATION</b> .....                               | <b>19</b> |
| 304 | <b>7.1 Screening data, eligibility, and recruitment</b> .....  | <b>19</b> |
| 305 | <b>7.2 Withdrawal/Follow-up</b> .....                          | <b>20</b> |

|     |                                                            |           |
|-----|------------------------------------------------------------|-----------|
| 306 | <b>7.3 Baseline patient characteristics</b> .....          | <b>20</b> |
| 307 | <b>8. ANALYSIS</b> .....                                   | <b>20</b> |
| 308 | <b>8.1 Analysis of the primary efficacy endpoint</b> ..... | <b>20</b> |
| 309 | 8.1.2 Oswestry disability index (ODI).....                 | 20        |
| 310 | 8.1.2 Statistical methods.....                             | 20        |
| 311 | 8.1.3 Missing data.....                                    | 20        |
| 312 | <b>8.2 Analysis of the secondary endpoints</b> .....       | <b>21</b> |
| 313 | 8.2.1 Missing data.....                                    | 21        |
| 314 | <b>8.3 Subgroup analyses</b> .....                         | <b>21</b> |
| 315 | <b>9. SAFETY ANALYSES</b> .....                            | <b>21</b> |
| 316 | <b>9.1 Adverse Events</b> .....                            | <b>21</b> |
| 317 | <b>9.2 Clinical Laboratory Parameters</b> .....            | <b>21</b> |
| 318 | <b>9.3 Vital Signs</b> .....                               | <b>21</b> |
| 319 | <b>10. STATISTICAL SOFTWARE</b> .....                      | <b>21</b> |
| 320 | <b>11. REFERENCES</b> .....                                | <b>21</b> |
| 321 |                                                            |           |
| 322 |                                                            |           |

323 4. Introduction

324

325 4.1 Background and rationale

326 Spinal cord stimulation (SCS) is a widely applied therapy to treat chronic neuropathic pain, and one of the  
327 most common indications is persisting radicular neuropathic pain following lumbar spine surgery. In  
328 traditional SCS therapies, the objective has been to replace the pain sensation with paresthesia. The  
329 anticipation is that the electrical current alters pain processing by masking the sensation of pain with a  
330 comfortable tingling or paresthesia. Although patients mostly cope with paresthesia, a significant  
331 proportion reports that the sensation is unpleasant.

332 'Burst' SCS utilizes complex programming to deliver high-frequency stimuli. This SCS technique seems to  
333 provide paresthesia-free stimulation, resulting in better pain relief of low back and leg pain than traditional  
334 tonic stimulation.

335 The widespread use of SCS has not been backed by solid evidence. The absence of placebo-controlled trials  
336 has long been an important point of criticism, but due to the nature of the intervention with sensation of  
337 paresthesia, studies with placebo control have so far not been considered possible. When 'burst' SCS is  
338 used the stimulation is often unnoticed by the patient, allowing comparison with placebo stimulation.  
339 The aim of this randomized double-blind sham-controlled crossover trial is to evaluate the efficacy of  
340 'burst' spinal cord stimulation for chronic radicular pain following spine surgery.

341

342 4.2 Trial objectives

343 4.2.1 Primary objective

344 The primary aim is to evaluate the efficacy of burst spinal cord stimulation versus sham/placebo for  
345 chronic radicular pain following spine surgery measured by the Oswestry disability index (ODI).

346

347 4.2.2 Secondary objectives

348 The secondary objectives are to assess if there are any differences between active burst stimulation and  
349 sham/placebo with regards to:

350 Changes in health-related quality of life measured with the Euro-QoL-5D (EQ-5D)

351 Back pain and leg pain measured using numerical rating scales (NRS)

352 Daily physical activity measured by use of a body-worn accelerometer (activPALs from PAL Technologies  
353 Ltd., Glasgow, United Kingdom) attached by a waterproof tape to the midpoint of the patients' anterior  
354 right thigh

355 If the mean difference in ODI change between active stimulation and placebo exceeds the predefined  
356 minimal clinically important difference of 10 points, a cost-effectiveness analysis will be performed (health  
357 care providers' cost per gained quality-adjusted life year)

358

359 Secondary objectives also include complications and surgical revisions of the implanted SCS systems. At the  
360 end of each treatment period study participants were asked whether they believe they received active  
361 burst stimulation or not.

362

363 5. Trial methods

364

365 5.1 Trial design

366 This is a single center randomized controlled crossover study performed at St. Olavs Hospital, Trondheim,  
367 Norway. Both specialist health care services and general practitioners in Norway can refer patients for  
368 assessment of study eligibility. Initial assessment of study eligibility was performed at the Multidisciplinary  
369 outpatient clinic for back, neck and shoulder rehabilitation, St. Olavs Hospital. The surgical procedures and  
370 postoperative follow-up will be performed at the Department of Neurosurgery, St. Olavs Hospital.

371



372 5.2 Randomization

373 During the 12 months following spinal cord stimulator implantation the study participants will undergo  
374 four three-month long periods with either burst SCS or no stimulation (sham) in a randomized order. All  
375 patients had two periods of SCS and two with sham stimulation. The outcome measures were collected  
376 prior to the test period and at the end of each of the four treatment periods.

377

378 5.3 Sample size

379 For the sample size calculation, the outcome variable was defined as the difference between each  
380 participant’s mean ODI scores under “treatment A” and “treatment B”. Assuming that the population  
381 mean and the standard deviation for the differences are 10 and 18, respectively, a one sample t-test of the  
382 differences at the 5% significance level needs 34 study participants to achieve 90% power. Due to expected  
383 loss to follow-up of 10-20% and breakthrough of paresthesia during burst stimulation in 20-30% of patients  
384 we aimed at including a total of 50 study participants.

385

386 5.4 Statistical framework

387

388 5.4.1 Hypothesis test

389 First, a test of overall effect of treatment measured by ODI is performed. The null hypothesis is that there  
390 is no difference in mean change of ODI from baseline to the end of each intervention period between the  
391 active burst stimulation periods and the placebo periods. The alternative hypothesis is that there is a  
392 difference between active burst stimulation and sham/placebo. The test will be performed at the two-  
393 sided 5% significance level. A difference in the effect of the treatment arms will be claimed if the null  
394 hypothesis is rejected. That is, the two-sided p-value is less than 5%. Superiority of active burst stimulation  
395 will be claimed if the two-sided p-value in the test comparing the change from baseline is less than 5%, and  
396 if the effect goes in favor of active stimulation.

397

398 5.4.2 Statistical interim analyses and stopping guidance

399 There were no interim analyses in this trial.

400

401 5.4.3 Timing of final analysis

402 The main analysis is planned when all study participants have concluded a minimum of 360 days of follow-  
403 up following implantation of the complete SCS system, all data up to one year has been entered, verified  
404 and validated, and the primary database has been locked.

405

406 5.4.4 Timing of outcome assessments

407 For all clinically planned measures, visits should occur within a time window of the scheduled visit. Visits  
408 outside these predefined time windows are regarded as protocol deviations. The target day and time  
409 windows are defined as:

410

| Visit label                                                                                                               | Target day | Definition (Day window) |
|---------------------------------------------------------------------------------------------------------------------------|------------|-------------------------|
| Clinical assessment at the multidisciplinary outpatient clinic, initial evaluation of study eligibility, informed consent | -60        | Prior to Day 0          |
| Collection of patient reported outcome measures (PROMs) and activePAL registration*                                       | -40        | Prior to Day 0          |

|                                                                                                                               |                                                                                       |                           |
|-------------------------------------------------------------------------------------------------------------------------------|---------------------------------------------------------------------------------------|---------------------------|
| Trial stimulation<br>Registration of leg and back<br>pain NRS.                                                                | -14                                                                                   | Prior to Day 0            |
| Evaluation of trial<br>stimulation and final<br>evaluation of study<br>eligibility. Registration of leg<br>and back pain NRS. | Day 0<br>Eligible for study<br>participation: implantation<br>of complete SCS system. | Target day +/- 7 days     |
| 1 <sup>st</sup> randomization                                                                                                 | Day 1                                                                                 | Target day +/-2 days      |
| Collection of PROMs, 2 <sup>nd</sup><br>randomization                                                                         | Day 90 from implantation                                                              | Target day +/- 15 days    |
| activePAL registration*                                                                                                       | Day 90-180                                                                            | > 7 days prior to Day 180 |
| Collection of PROMs, 3 <sup>rd</sup><br>randomization                                                                         | Day 180 from implantation                                                             | Target day +/- 15 days    |
| activePAL registration*                                                                                                       | Day 180-270                                                                           | > 7 days prior to Day 270 |
| Collection of PROMs, 4 <sup>th</sup><br>randomization                                                                         | Day 270 from implantation                                                             | Target day +/- 15 days    |
| activePAL registration*                                                                                                       | Day 270-360                                                                           | > 7 days prior to Day 360 |
| Collection of PROMs, final<br>study visit                                                                                     | Day 360 from implantation                                                             | Target day +/- 15 days    |

411

412 \*Three activePAL registrations are planned: 1) prior to the trial stimulation 2) once during sham/placebo,  
413 and 3) once during active burst stimulation

414

415 5.5 Blinding procedure  
416 Quadruple blinding:  
417 Participant  
418 Care Provider  
419 Investigator  
420 Outcomes Assessor

421

422 The patients were blinded to the actual treatment allocation during the different study periods. The  
423 surgeons and all study personnel involved in handling the patients and collecting the study data (except  
424 those who perform the actual setting of the device) were blinded to the actual treatment allocation. All  
425 study personnel evaluation end points measures will be blinded to the actual treatment. All the tables and  
426 figures to be presented from the study will be settled before any data from the study is evaluated to avoid  
427 selective presentation of findings according to statistical results. The statistician performing the statistical  
428 procedures on the outcome of the study will be blinded. The data will only show treatment allocation as  
429 treatment A and treatment B. Then the tables and figures are filled in. To minimize the possibility of  
430 incidental unblinding the main outcome measure will be evaluated first, then the secondary endpoints,  
431 and lastly adverse effects. Only after all this has been performed and the procedures documented at the  
432 Unit for Applied Clinical Research (NTNU), the codes will be broken. The only remaining procedure will  
433 then be to substitute treatment A and B in the tables and figures with active and placebo. This ambitious  
434 procedure will secure maximum possible blinding of the study, integrity of the study and make the study  
435 results trustworthy.

436

437 6. Statistical principles

438

439 6.1 Confidence intervals and p-values

440 All calculated p-values will be two-sided and compared to a 5% significance level. If a p-value is less than  
441 0.05, the null hypothesis will be discarded. Efficacy estimates for the two arms will be presented with two-  
442 sided 95% confidence intervals.

443

#### 444 6.2 Adherence and protocol deviations

445 The number and proportion of patients that received the intervention they were randomized to will be  
446 presented

447

448 The following are pre-defined major protocol deviations regarded to affect the efficacy of the intervention:  
449 Entering the trial when the eligibility criteria should have prevented trial entry

450 Outside the age criteria

451 Misdiagnosed

452 Insufficient leg pain NRS reduction following trial stimulation

453 Received other intervention than allocated to

454

455 The number (and percentage) of patients with major protocol deviations and detail of type of deviation will  
456 be provided. All randomized interventions will be used as the denominator to calculate the percentages.

457 No formal statistical testing will be undertaken.

458

#### 459 6.3 Analysis populations

460 We define the following populations in this trial:

461 **All randomized patients:** All patients that have been randomized regardless if they actually received  
462 treatment or not.

463 **Full analysis set (FAS):** All patients that are randomized, received treatment, and where ODI was measured  
464 at least once post baseline/following implantation of the complete SCS system. Patients are allocated to  
465 the treatment period they were randomized to.

466 **Complete case set (CCS):** The subset of patients in the FAS that has ODI measurements at all follow-up  
467 visits. Patients are allocated to the treatment period they were randomized to.

468

469 The FAS will be used for the primary analysis, while the CCS will be used for sensitivity analyses.

470

### 471 7. Trial population

472

#### 473 7.1 Screening data, eligibility, and recruitment

474 The total number of screened patients and reasons for not entering the trial will be summarized and  
475 tabulated. A CONSORT flow diagram will be used to summarize the number of patients who were:

476 Assessed for eligibility

477 Eligible at initial evaluation

478 Eligible at initial evaluation and underwent trial stimulation

479 Eligible following trial stimulation

480 Eligible following trial stimulation but not randomized\*

481 Received the randomized allocation

482 Did not receive the randomized allocation\*

483 Lost to follow-up

484 Randomized and included in the primary analysis

485 Randomized and excluded from the primary analysis\*

486

487 \*Reasons will be provided

488

489 7.2 Withdrawal/Follow-up  
490 The status of eligible and randomized patients at trial end will be tabulated by treatment group according  
491 to whether they  
492 Completed intervention, but not assessments  
493 Completed assessments, but not intervention  
494 Withdrew consent  
495 Did not complete follow-up  
496 Unable to measure the primary endpoint due to:  
497 Comorbidity that compromised treatment or testing  
498 Death during follow-up  
499  
500 Time from randomization to treatment discontinuation and time from randomization to withdrawal/lost to  
501 follow-up will be presented graphically using a CONSORT flow diagram.  
502  
503 7.3 Baseline patient characteristics  
504 The patient demographics and baseline characteristics include age, gender, body-mass index, educational  
505 level, comorbidity, American Society of Anesthesiologists physical status grade, smoking status, number of  
506 previous spine surgeries, baseline activity level, and baseline PROMs. The patient demographics and  
507 baseline characteristics will be summarized and presented using descriptive statistics (N, mean, standard  
508 deviation, median) for continuous variables, and number and percentages of patients for categorical  
509 variables. As this is a crossover trial, important clinical imbalances between treatment arms are unlikely.  
510  
511 8. Analysis  
512  
513 8.1 Analysis of the primary efficacy endpoint  
514 8.1.2 Oswestry disability index (ODI)  
515 The primary outcome is difference in mean change from baseline in disease specific functional outcome  
516 (ODI version 2.0) between active burst stimulation and placebo/sham.(1)  
517  
518 ODI has been translated into Norwegian and tested for psychometric properties.(2) The ODI questionnaire  
519 is used to quantify disability for degenerative conditions of the lumbar spine and covers intensity of pain,  
520 ability to lift, ability to care for oneself, ability to walk, ability to sit, sexual function, ability to stand, social  
521 life, sleep quality, and ability to travel. For each topic there are six statements describing potential  
522 scenarios, and patients select the one that most closely resembles their situation. The index is scored from  
523 0 to 100. Zero means no disability and 100 reflects maximum disability.  
524  
525  
526 8.1.2 Statistical methods  
527 Mean +/- SD or summary statistics appropriate for the distribution will be reported for the primary  
528 outcome and each of the key secondary outcomes. The two interventions will be compared using a linear  
529 mixed model adjusting for random effects. The model will account for correlated data within the same  
530 subject. A 95% confidence interval will be reported for the difference between the interventions based on  
531 the linear mixed model. For the primary endpoint and other key endpoints listed in section 4, the type I  
532 error rate will be controlled at two-sided alpha = 0.05.  
533  
534 8.1.3 Missing data  
535 Missing data will not be imputed for the primary analysis in this study. All statistical methods for handling  
536 missing data rely on untestable assumptions and there is no one correct way to handle missing data. Our

537 goal is to minimize the amount of missing data so that the results will not be sensitive to which statistical  
538 method is used.

539

540

## 541 8.2 Analysis of the secondary endpoints

542 Regardless of the results of the primary outcome, summary statistics will be tabulated by treatment arm  
543 for EQ-5D, leg pain 0-10 NRS, back pain 0-10 NRS, and physical activity level (steps per day and time spent  
544 standing and walking). The two interventions will be compared using a linear mixed model adjusting for  
545 random effects. The Norwegian version of EQ-5D has shown good psychometric properties.(3) If the mean  
546 difference in ODI change between active stimulation and placebo exceeds the predefined minimal clinically  
547 important difference, a cost-effectiveness analysis will be performed (health care providers' cost per  
548 gained quality-adjusted life year)

### 549 8.2.1 Missing data

550 For the secondary outcomes, missing data will not be imputed in this study.

551

## 552 8.3 Subgroup analyses

553 No subgroup analyses are planned for this study.

## 554 9. Safety Analyses

555

### 556 9.1 Adverse Events

557 Complications, adverse events, and surgical revisions of the implanted SCS system are continuously  
558 registered and will presented. This includes but is not limited to thromboembolic events, wound healing  
559 problems, infections, postoperative hematoma, cerebrospinal fluid leak/unintentional durotomy, and  
560 nerve-damage.

561

### 562 9.2 Clinical Laboratory Parameters

563 Not applicable.

564

### 565 9.3 Vital Signs

566 Not applicable.

567

## 568 10. Statistical Software

569 All statistical analyses will be done using SPSS version 27 (IBM corp., Chicago, IL) and R version 3.6.3 (R  
570 Core Team, R: A language and environment for statistical computing. R Foundation for Statistical  
571 Computing, Vienna, Austria. URL <https://www.R-project.org/>).

572

## 573 11. References

574 1. Fairbank JC, Couper J, Davies JB, O'Brien JP. The Oswestry low back pain disability questionnaire.  
575 Physiotherapy. 1980;66(8):271-3.

576 2. Grotle M, Brox JJ, Vøllestad NK. Cross-cultural adaptation of the Norwegian versions of the Roland-  
577 Morris Disability Questionnaire and the Oswestry Disability Index. J Rehabil Med. 2003;35(5):241-7.

578 3. Solberg TK, Olsen JA, Ingebrigtsen T, Hofoss D, Nygaard OP. Health-related quality of life  
579 assessment by the EuroQol-5D can provide cost-utility data in the field of low-back surgery. Eur Spine J.  
580 2005;14(10):1000-7.

581

582
