# Supplementary material
Source: PubMed Central journal article supplement (PMC9579901)
Supplement: jama-e2218231-s003.pdf [file jama-e2218231-s003.pdf]

## Data Sharing Statement

Hara. Effect of Spinal Cord Burst Stimulation vs Placebo Stimulation on Disability in Patients With Chronic Radicular Pain After Lumbar Spine Surgery. *JAMA*. Published October 18, 2022. doi:10.1001/jama.2022.18231

### Data

**Data available:** Yes

**Data types:** Deidentified participant data

**How to access data:** Request for data can be sent to [sasha.gulati@ntnu.no](mailto:sasha.gulati@ntnu.no). Data can only be shared if permission is granted by the Regional Ethical Committee for Medical Research in South East Norway.

**When available:** With publication

### Supporting Documents

**Document types:** None

### Additional Information

**Who can access the data:** Researchers whose proposed use of the data has been approved

**Types of analyses:** Meta-analysis or systematic review

**Mechanisms of data availability:** After approval of a proposal and with a signed data access agreement.
